# Supplementary material for: Telomerase-targeting compounds Imetelstat and 6-thio-dG act synergistically with chemotherapy in high-risk neuroblastoma models
Source: PubMed Central journal article supplement (PMC9579108; doi:10.1007/s13402-022-00702-8), 2022-08-12
Supplement: 13402_2022_702_MOESM1_ESM.pdf [file 13402_2022_702_MOESM1_ESM.pdf]

**Suppl. Table 1**

| <b>Cell line</b> | <b>TMM</b>      | <b>MYCN/TERT status</b> | <b>TERT expression</b> | <b>ALK status</b> |
|------------------|-----------------|-------------------------|------------------------|-------------------|
| <b>BE(2)C</b>    | Telomerase pos. | <i>MYCN</i> amplified   | 10.31                  | WT                |
| <b>CLB-GA</b>    | Telomerase pos. | <i>TERT</i> rearr.      | 13.67                  | R1275Q            |
| <b>GI-MEN</b>    | Telomerase pos. | <i>TERT</i> rearr.      | 13.88                  | WT                |
| <b>IMR-32</b>    | Telomerase pos. | <i>MYCN</i> amplified   | 10.95                  | WT                |
| <b>KELLY</b>     | Telomerase pos. | <i>MYCN</i> amplified   | 11.37                  | F1174L            |
| <b>LS</b>        | Telomerase pos. | <i>MYCN</i> amplified   | 10.49                  | WT                |
| <b>SH-SY5Y</b>   | Telomerase pos. | WT                      | 12.38                  | F1174L            |
| <b>SK-NFI</b>    | ALT             | WT                      | 8.81                   | D1529E            |
| <b>TR-14</b>     | Telomerase pos. | <i>MYCN</i> amplified   | 8.92                   | amplified         |

**Suppl. Table 1:** Molecular characteristics of cell lines used in this study; TMM, telomere maintenance mechanism; WT, wild-type; ALT, alternative lengthening of telomeres. *TERT* expression is given as log<sub>2</sub> intensity according to microarray analysis.
