# Supplementary material for: Telomerase-targeting compounds Imetelstat and 6-thio-dG act synergistically with chemotherapy in high-risk neuroblastoma models
Source: PubMed Central journal article supplement (PMC9579108; doi:10.1007/s13402-022-00702-8), 2022-08-12

# Suppl. Fig. 3

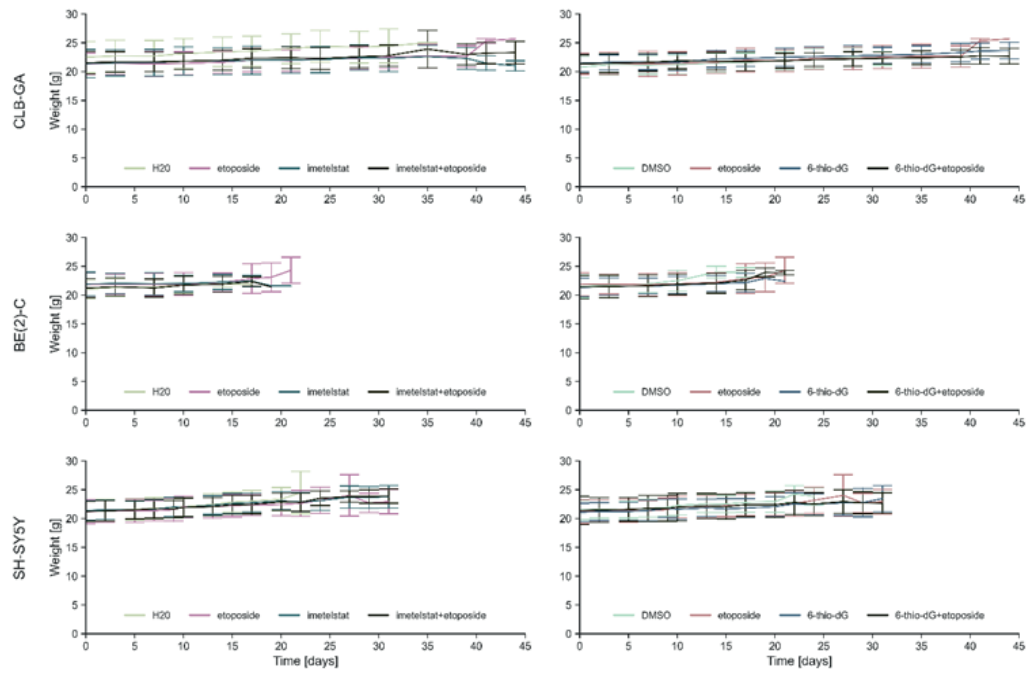

Supplement: 13402_2022_702_MOESM4_ESM.pdf [file 13402_2022_702_MOESM4_ESM.pdf]
